# Supplementary material for: Lignocellulosic full-components hydrogelation using steam-exploded corn stover
Source: Royal Society of Chemistry journal article supplement (doi:10.1039/d4gc00579a), 2024-01-01
Supplement: d4gc00579a1.pdf [file d4gc00579a1.pdf]

## Electronic Supplementary Information

### Lignocellulosic full-components hydrogelation using steam- exploded corn stover

Tairan Pang <sup>a,b</sup>, Lan Wang <sup>a,b\*</sup>, and Hongzhang Chen <sup>a,b</sup>

<sup>a</sup> State Key Laboratory of Biochemical Engineering, Beijing Key Laboratory of Biomass Refining Engineering, Institute of Process Engineering, Chinese Academy of Sciences, Beijing 100190, China

<sup>b</sup> School of Chemical Engineering, University of Chinese Academy of Sciences, Beijing 100049, China

\* Corresponding authors: [wanglan@ipe.ac.cn](mailto:wanglan@ipe.ac.cn) (L. W.).

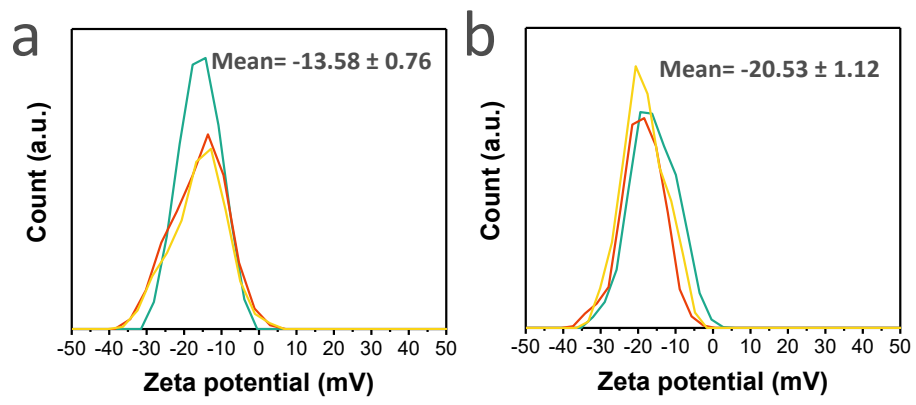

**Fig. S1.** Zeta potential of CS (a) and SECS (b).

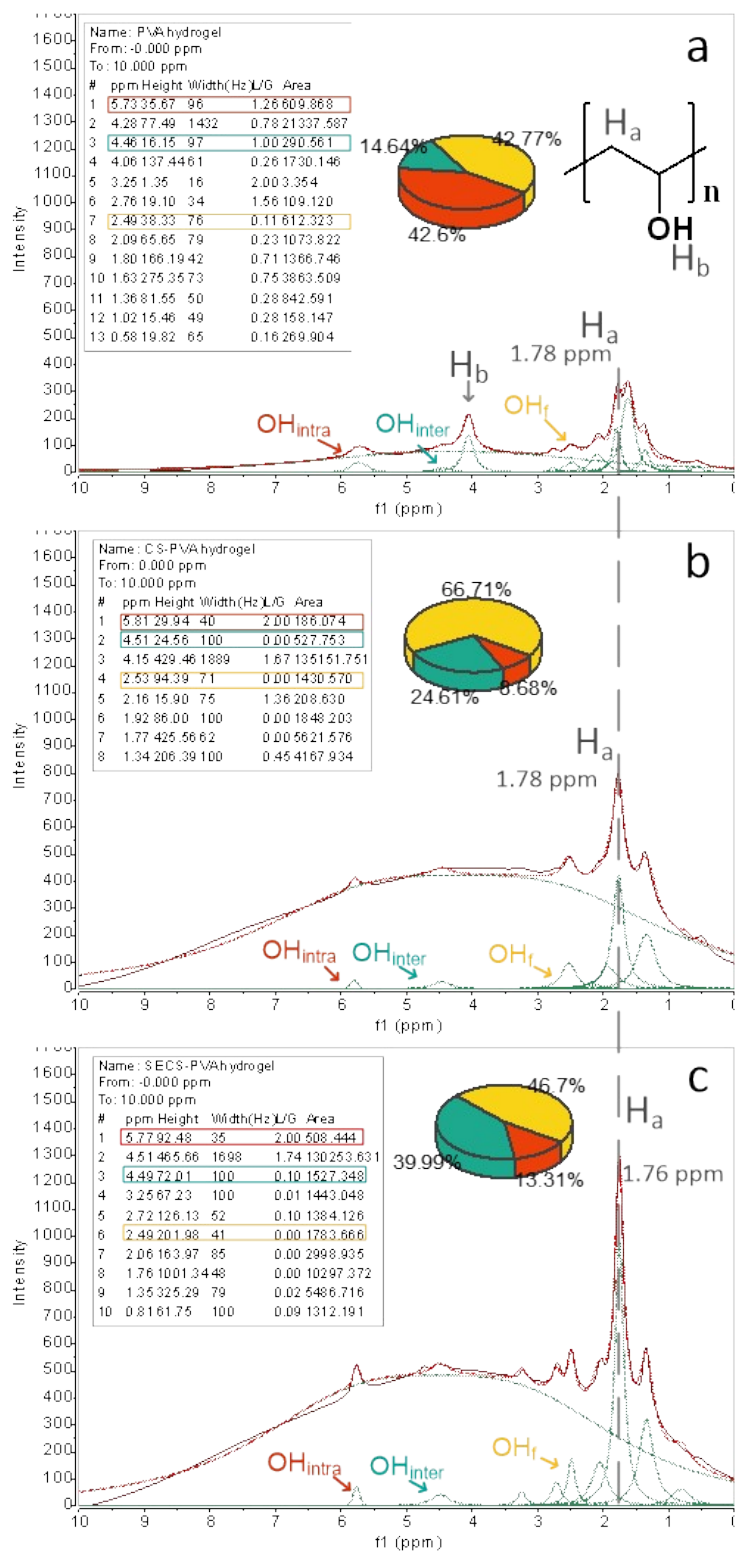

**Fig. S2.**  $^1\text{H}$  solid-state NMR spectroscopy of PVA hydrogel (a), CS-PVA hydrogel (b) and SECS-PVA hydrogel (c).

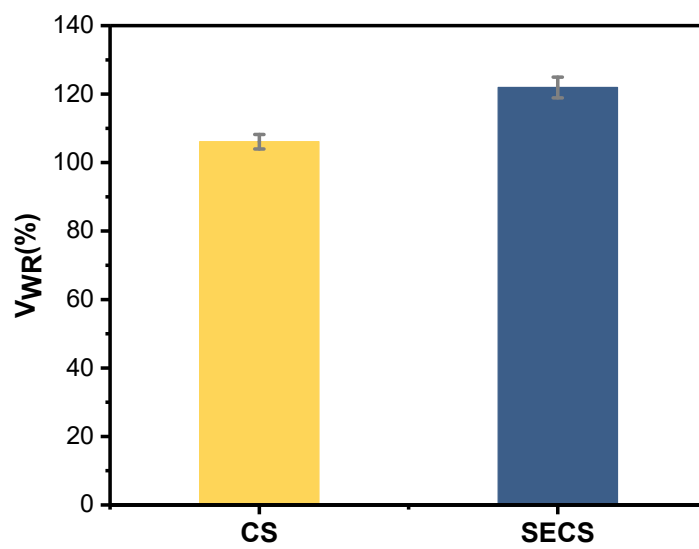

**Fig. S3.** Water retention property of CS and SECS.

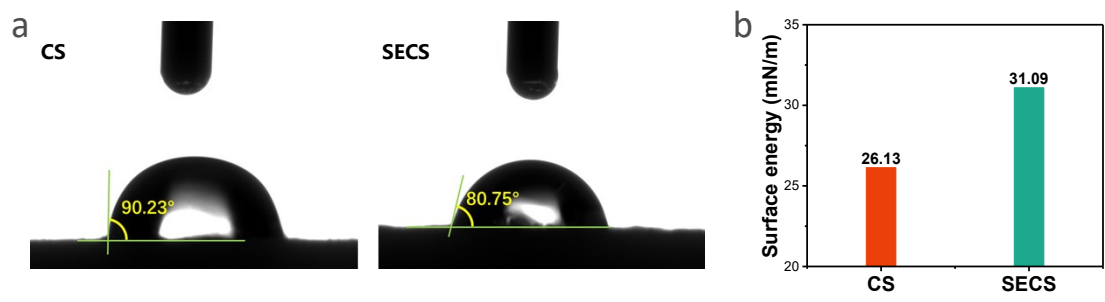

**Fig. S4.** Contact angle (a) and surface energy results (b) of CS and SECS.

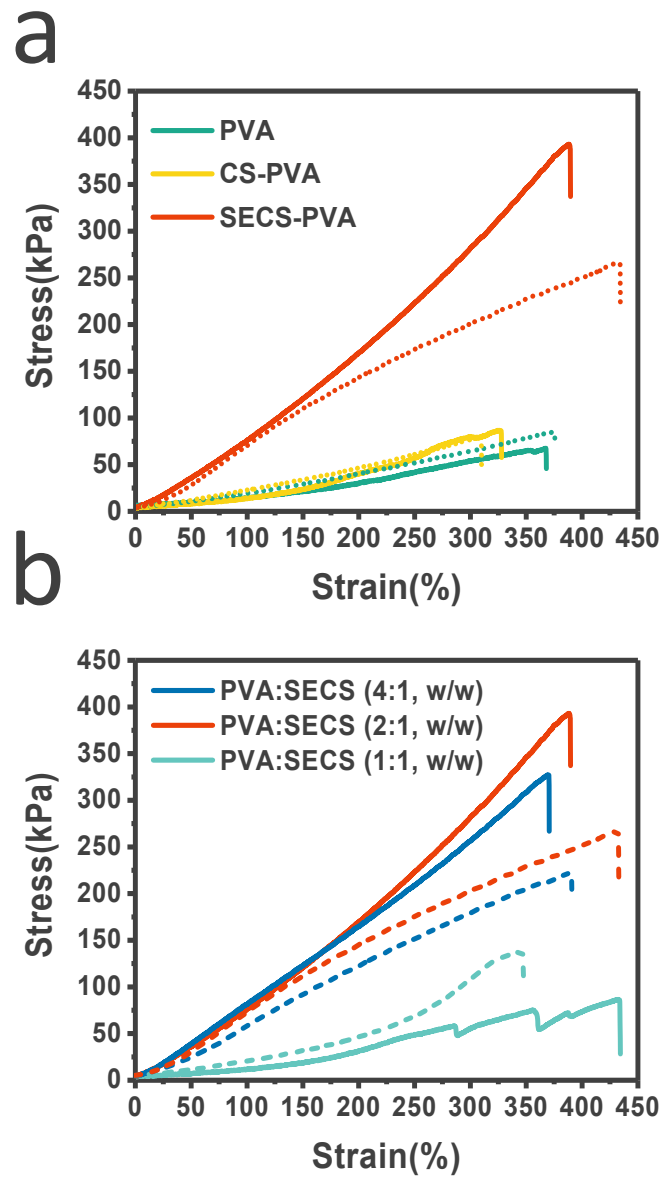

**Fig. S5.** Stress-strain curves of PVA, CS-PVA, and SECS-PVA hydrogels (a) as well as SECS-PVA hydrogels with different SECS addition (b).

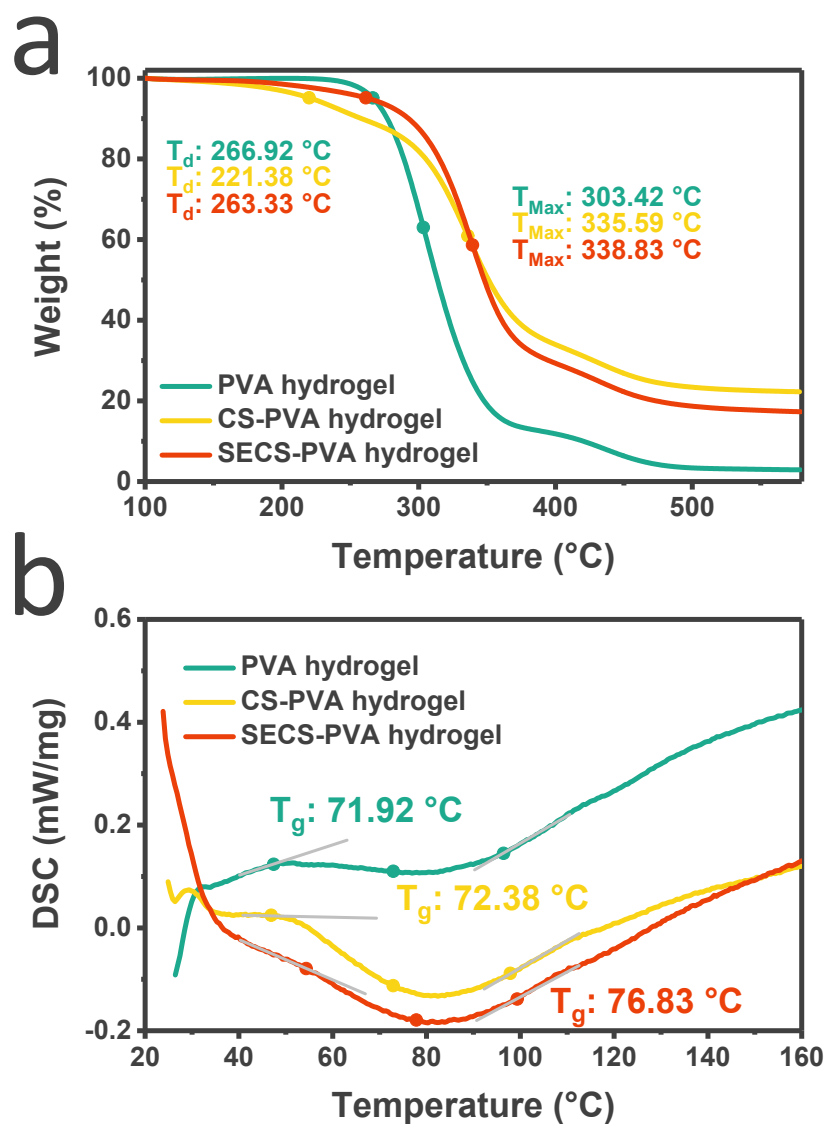

**Fig. S6.** Thermogravimetric analysis (a) and differential scanning calorimetry (b) results of PVA hydrogels, CS-PVA hydrogels and SECS-PVA hydrogels.

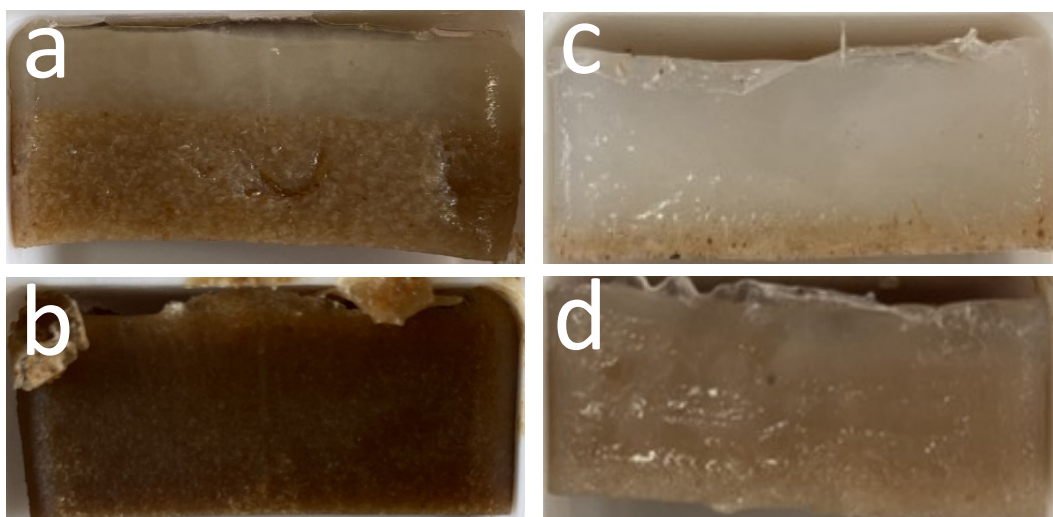

**Fig. S7.** Photos of wheat bran-PVA hydrogel (a), steam-exploded wheat bran-PVA hydrogel (b), poplar-PVA hydrogel (c), and steam-exploded poplar-PVA hydrogel (d).



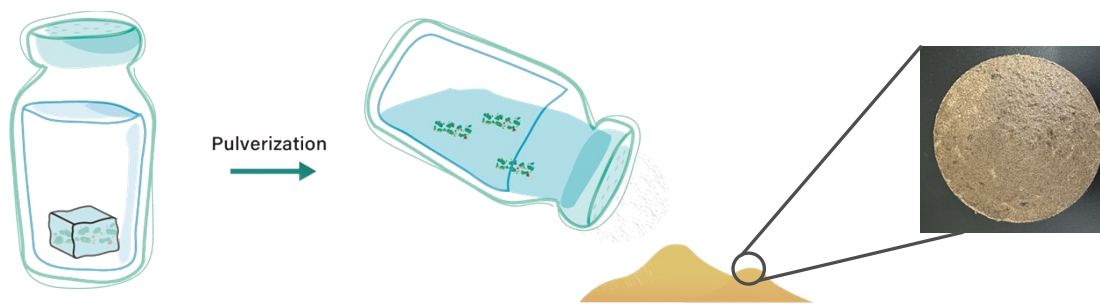

**Fig. S8.** Schematic diagram of sand fixing agent preparation.

**Table S1** Percentage of component in CS and SECS.

| <b>Sample</b> | <b>Cellulose (%)</b> | <b>Hemicellulose (%)</b> | <b>Lignin (%)</b> | <b>Ash (%)</b> |
|---------------|----------------------|--------------------------|-------------------|----------------|
| CS            | 42.23±0.92           | 18.81±0.09               | 34.50±3.65        | 4.45±0.44      |
| SECS          | 45.27±0.59           | 15.25±0.54               | 36.92±3.32        | 2.56±0.85      |

**Table S2** Processing methods and characteristics of lignocellulose-based hydrogels in similar work.

| Materials                          |          | Processing Information   |                                                |                                                                       |                                                                              | Characteristics      |                                            | Ref. |
|------------------------------------|----------|--------------------------|------------------------------------------------|-----------------------------------------------------------------------|------------------------------------------------------------------------------|----------------------|--------------------------------------------|------|
| Lignocellulose                     | Polymers | Lignocellulose content   | Lignocellulose treatment                       | Hydrogel fabrication                                                  | Reagents                                                                     | Max tensile strength | Characteristics provided by lignocellulose |      |
| Cellulose                          | PVA      | 50%                      | Cooking, pulping, separation, and purification | Blended with BzMe <sub>3</sub> NOH aqueous solution and frozen-thawed | BzMe <sub>3</sub> NOH and epichlorohydrin                                    | 37.30 kPa            | Not mentioned                              | 1    |
| Cellulose nanocrystals             | PVA      | about 10%                | Separation, purification, and nanolization     | Blended with borax                                                    | Polyaniline, tannic acid, silver nitrate, and H <sub>2</sub> SO <sub>4</sub> | 246.10 kPa           | Not mentioned                              | 2    |
| Cellulose nanocrystals             | PVA      | 5.0%                     | Separation, purification, and nanolization     | Blended with borax under ultrasonic                                   | Citric, HCl, borax, and aniline                                              | 171.52 kPa           | Not mentioned                              | 3    |
| Cellulose nanofibril               | PVA      | 3.1% to 7.9%             | Separation, purification, and nanolization     | Blended with the sodium borate solution                               | TEMPO, CaCl <sub>2</sub> , and Na <sub>2</sub> B <sub>4</sub> O <sub>7</sub> | about 3.30 kPa       | Not mentioned                              | 4    |
| Lignin nanoparticles and cellulose | PVA      | Not explicitly mentioned | Separation, purification, and                  | Blended with glutaraldehyde, ultrasound                               | Glutaraldehyde, ethylene glycol, and HCl                                     | Not mentioned        | Tune pore structure, anti-oxidative and    | 5    |

|                                   |     |                |                                                                       |                                                                                            |                                                                                              |               |                                                    |           |
|-----------------------------------|-----|----------------|-----------------------------------------------------------------------|--------------------------------------------------------------------------------------------|----------------------------------------------------------------------------------------------|---------------|----------------------------------------------------|-----------|
| nanocrystals                      |     |                | nanolization                                                          | treatment, and dialysis                                                                    |                                                                                              |               | antibacterial activities                           |           |
| Alkali lignin                     | PAM | 0.14%          | Hydrothermal pretreatment, post-cooking, separation, and purification | One-pot free radical polymerization ultrasound treatment and activation                    | NaOH, ethylene glycol and ammonium persulfate                                                | 136.10 kPa    | Self-catalytic system (AL-Cu <sup>2+</sup> )       | 6         |
| 3-allyloxy-2-hydroxypropyl-lignin | PAA | 5.6% to 15.2%  | Separation and purification, and etherification                       | Blended with K <sub>2</sub> S <sub>2</sub> O <sub>8</sub> and N,N'-methylene bisacrylamide | NaOH, acetone, K <sub>2</sub> S <sub>2</sub> O <sub>8</sub> and N,N'-methylene bisacrylamide | Not mentioned | UV-shielding and antioxidant activity              | 7         |
| Lignin nanoparticles              | PAM | 4.5% to 22.0%  | Separation, purification, and nanolization                            | Blended with ascorbic acid and hydrogen peroxide                                           | Ascorbic acid and H <sub>2</sub> O <sub>2</sub>                                              | 128.50 kPa    | Not mentioned                                      | 8         |
| Seam-exploded corn stover         | PVA | 10.0% to 50.0% | Steam explosion activation                                            | Blended and frozen-thawed                                                                  | Water                                                                                        | 329.75 kPa    | Porosity, antioxidant activity, UV-shielding, etc. | This work |

## Reference

1. Y. Wang, L. Zhang and A. Lu, *J. Mater. Chem. A*, 2020, **8**, 13935-13941.
2. F. Lin, Z. Wang, Y. Shen, L. Tang, P. Zhang, Y. Wang, Y. Chen, B. Huang and B. Lu, *J. Mater. Chem. A*, 2019, **7**, 26442-26455.
3. M. Song, H. Yu, J. Zhu, Z. Ouyang, S. Y. H. Abdalkarim, K. C. Tam and Y. Li, *Chem. Eng. J.*, 2020, **398**, 125547.
4. X. Jing, H. Li, H.-Y. Mi, Y.-J. Liu, P.-Y. Feng, Y.-M. Tan and L.-S. Turng, *Sens. Actuators, B*, 2019, **295**, 159-167.
5. W. Yang, F. Xu, X. Ma, J. Guo, C. Li, S. Shen, D. Puglia, J. Chen, P. Xu, J. Kenny and P. Ma, *Mater. Sci. Eng. C*, 2021, **129**, 112385.
6. D. Sun, Y. Feng, S. Sun, J. Yu, S. Jia, C. Dang, X. Hao, J. Yang, W. Ren, R. Sun, C. Shao and F. Peng, *Adv. Funct. Mater.*, 2022, **32**, 2201335.
7. Y. Miao, Z. Tang, Q. Zhang, A. Reheman, H. Xiao, M. Zhang, K. Liu, L. Huang, L. Chen and H. Wu, *ACS Appl. Polym. Mater.*, 2022, **4**, 1448-1456.
8. Y. Chen, K. Zheng, L. Niu, Y. Zhang, Y. Liu, C. Wang and F. Chu, *Int. J. Biol. Macromol.*, 2019, **128**, 414-420.
